# Supplementary material for: Evidence of mitochondrial DNA in the chloroplast genome of Convallaria keiskei and its subsequent evolution in the Asparagales
Source: PubMed Central journal article supplement (PMC6430787; doi:10.1038/s41598-019-41377-w), 2019-03-22
Supplement: 41598_2019_41377_MOESM1_ESM.pdf [file 41598_2019_41377_MOESM1_ESM.pdf]

**Evidence of mitochondrial DNA in the chloroplast genome of  
*Convallaria keiskei* and its subsequent evolution in the  
Asparagales**

**G. Raman, S. Park, E. M. Lee & S. J. Park\***

Department of Life Sciences, Yeungnam University, Gyeongsan, Gyeongsan-buk, Republic of Korea

\*Corresponding author: S. J. Park, Department of Life Sciences, Yeungnam University, Gyeongsan, Gyeongsan-buk, Republic of Korea 38541; Tel.: +82 (53) 810-2377; Fax: +82 (53) 810-4618; Email: [sjpark01@ynu.ac.kr](mailto:sjpark01@ynu.ac.kr)

## Supplementary information

### Supplementary Figures

**Supplementary Fig. S1. Gene map of (A) *Convallaria keiskei* and (B) *Liriope spicata*.** Genes lying outside of the outer layer circle are transcribed in a counterclockwise direction, whereas genes inside this circle are transcribed in a clockwise direction. The colored bars indicate known protein-coding genes, tRNA genes, and rRNA genes. The dashed darker gray area in the inner circle denotes GC content, while the lighter gray area indicates genome AT content. LSC, large-single-copy; SSC, small-single-copy; IR, inverted repeat.

**Supplementary Fig. S2. Sequence alignment of 16 chloroplast genomes in the Asparagales family performed using the mVISTA program with *Convallaria keiskei* as a reference.** The top gray arrow shows genes in order (Transcriptional direction) and the position of each gene. A 70% cut-off was used for the plots. The Y-scale represents the percent identity between 50±100%. Red and blue areas indicate intergenic and genic regions, respectively. 1. *Convallaria keiskei*, 2. *Liriope spicata*, 3. *Maianthemum bicolor*, 4. *Nolina atopocarpa*, 5. *Polygonatum cyrtoneura*, 6. *Asparagus officinalis*, 7. *Corydalis indivisa*, 8. *Esutrepheus latifolius*, 9. *Aphyllanthes monspeliensis*, 10. *Mila biflora*, 11. *Anthericum ramosum*, 12. *Yucca brevifolia*, 13. *Agapanthus coddii*, 14. *Allium sativum*, 15. *Xanthorrhoeae preissii* and 16. *Aloe vera*.

**Supplementary Fig. S3.** Percentages of variable sites in protein-coding regions across the five Nolinoideae sub-family chloroplast genomes.

**Supplementary Fig. S4:** The schematic diagram represents the position of mitochondrial DNA in the *C. keiskei* cp genome.

**Supplementary Fig. S5:** Blast hit shows the sequence homology between mitochondrial DNA insert of *Convallaria keiskei* cp genome and *rpl10* of *Cocos nucifera* mitochondrial genome.

### Supplementary Tables

**Supplementary Table S1.** Summary of chloroplast genome characteristics of *Convallaria keiskei* and *Liriope spicata*.

**Supplementary Table S2.** List of genes present in the cp genomes of *Convallaria keiskei* and *Liriope spicata*.

**Supplementary Table S3.** The list of pseudogenes, intron deletion gene, and gene inversion in the Asparagales order of plants.

**Supplementary Table S4:** List of primers used in this study.

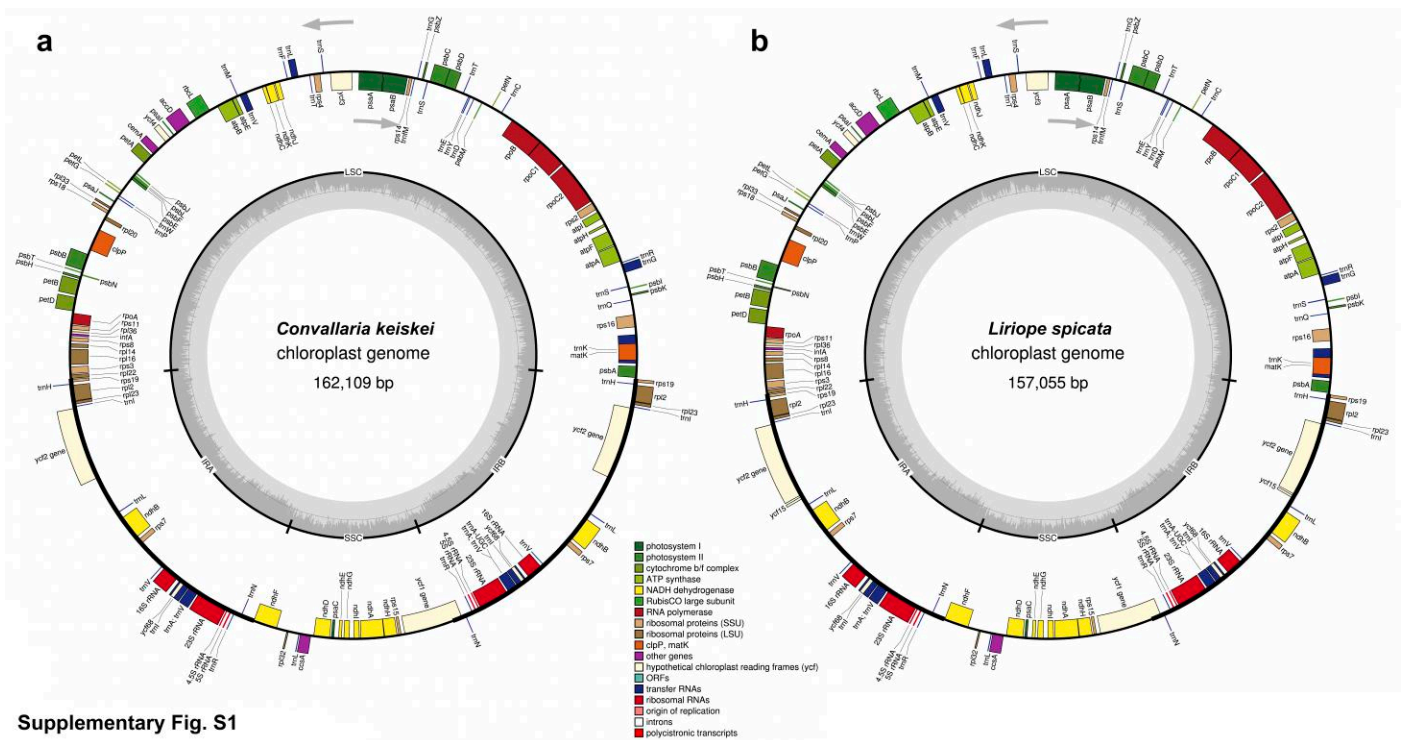

Supplementary Fig. S1

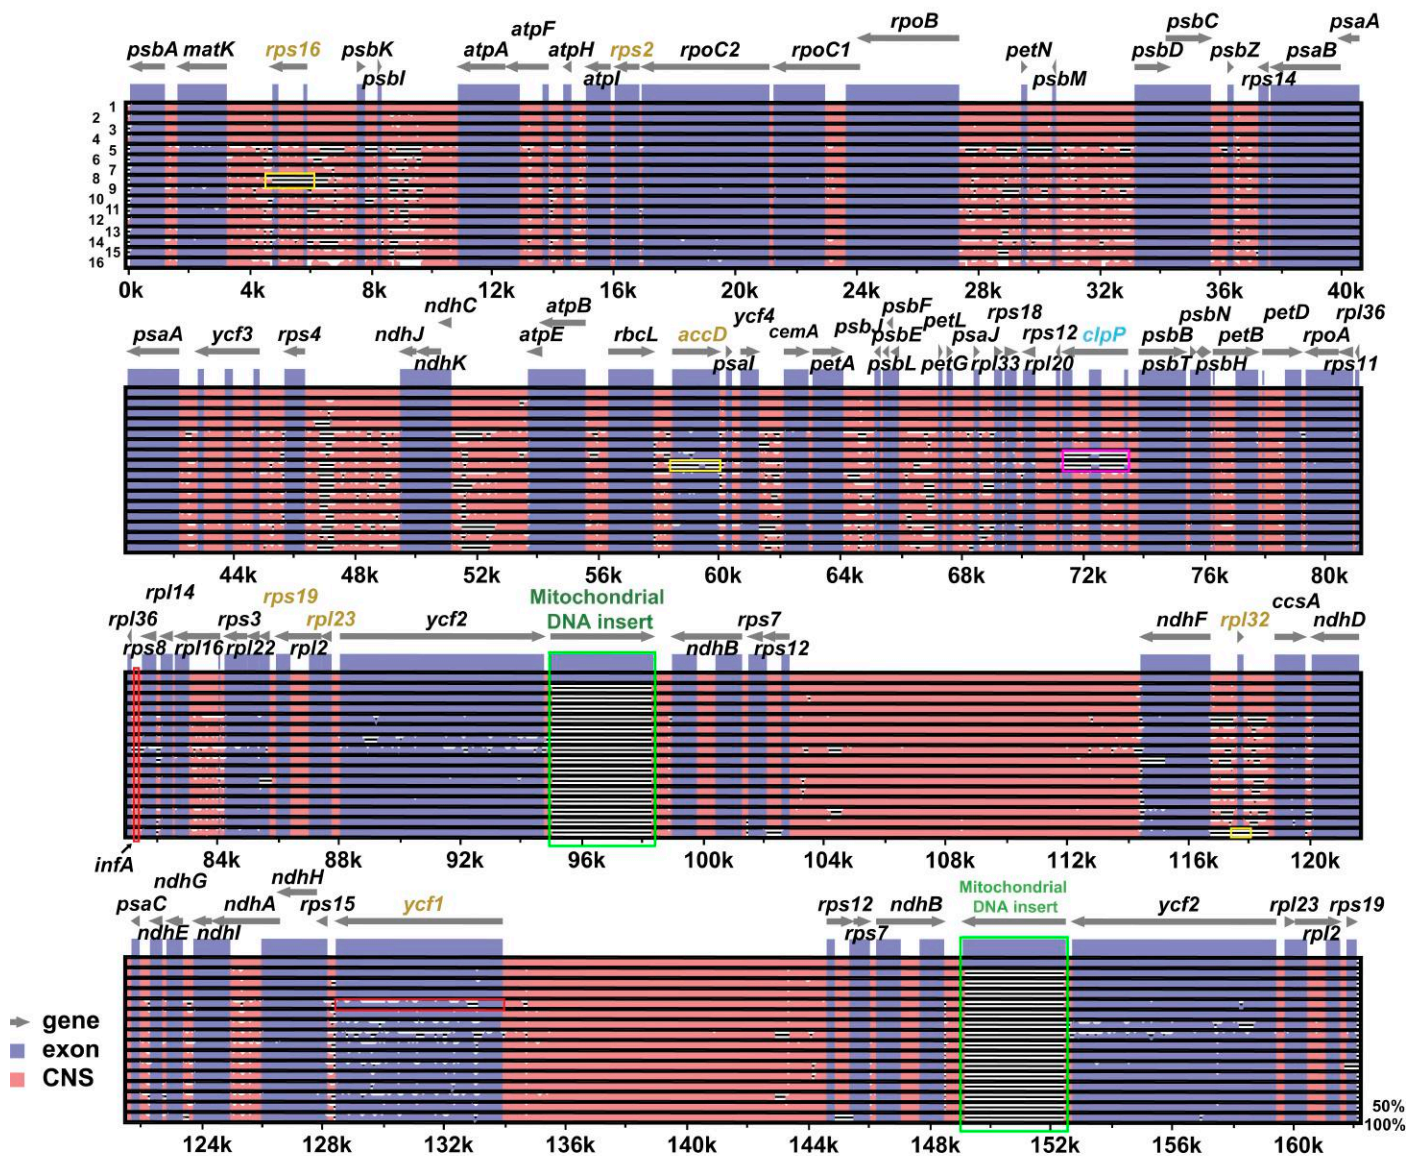

Supplementary Fig. S2

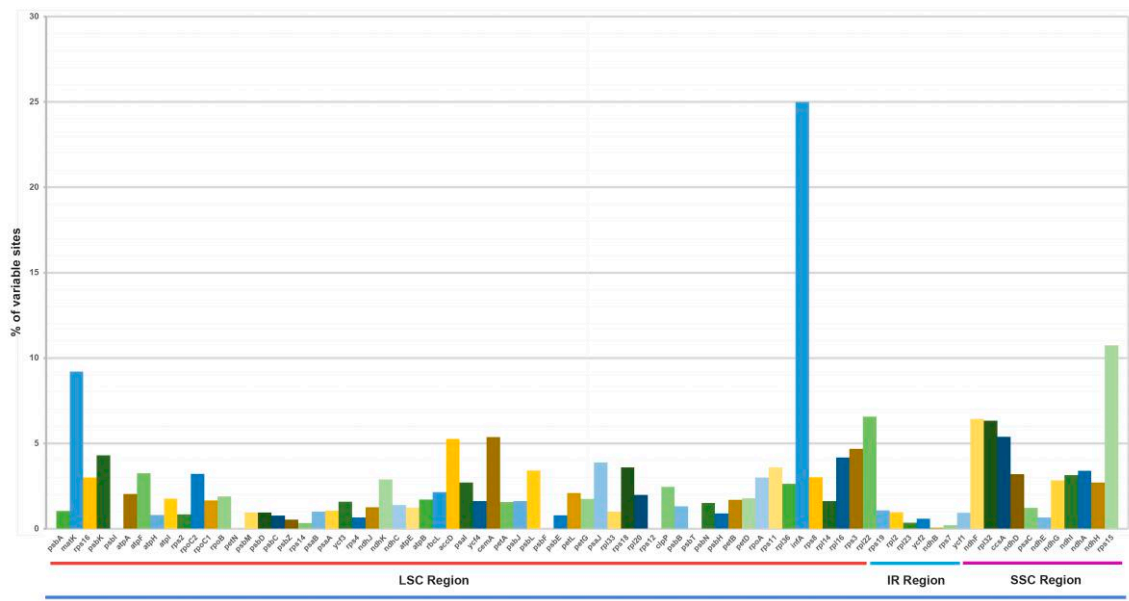

Supplementary Fig. S3

Protein-coding genes

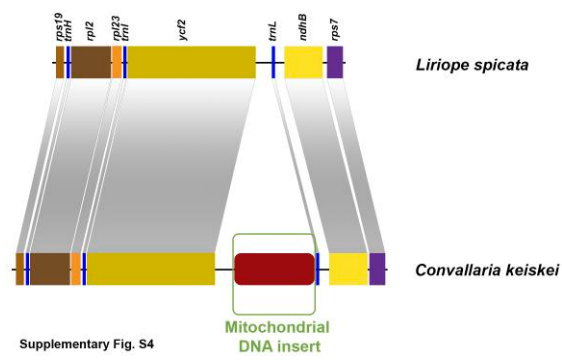

Supplementary Fig. S4

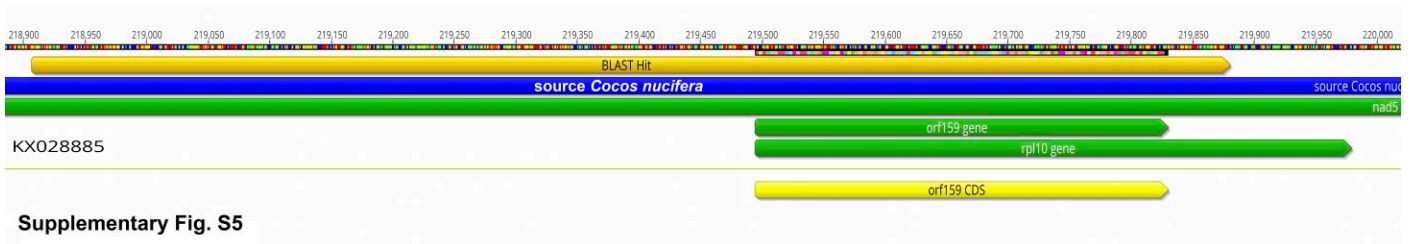

**Supplementary Table S1.** Summary of chloroplast genome characteristics of *Convallaria keiskei* and *Liriope spatia*

| Genome features                  | <i>Convallaria keiskei</i> | <i>Liriope spatia</i> |
|----------------------------------|----------------------------|-----------------------|
| Size (bp)                        | 162,109                    | 157,055               |
| LSC length (bp)                  | 85,344                     | 85,374                |
| SSC length (bp)                  | 18,487                     | 18,727                |
| IR length (bp)                   | 29,139                     | 26,477                |
| Total number of genes            | 131                        | 131                   |
| Number of genes                  | 112                        | 112                   |
| Protein-coding genes             | 78+7                       | 78+7                  |
| tRNA genes                       | 30+8                       | 30+8                  |
| rRNA genes                       | 4+4                        | 4+4                   |
| Number of genes duplicated in IR | 19                         | 19                    |
| GC content (overall %)           | 37.9                       | 37.6                  |
| GC content - LSC (%)             | 35.7                       | 35.6                  |
| GC content - SSC (%)             | 31.4                       | 31.2                  |
| GC content - IR (%)              | 43.2                       | 43.0                  |



1 **Supplementary Table S2.** List of genes present in the cp genomes of *Convallaria keiskei* and *Liriope spatia*.

| Category                                    | Group of genes                  | Name of genes                  |                                |                             |                             |                             |
|---------------------------------------------|---------------------------------|--------------------------------|--------------------------------|-----------------------------|-----------------------------|-----------------------------|
| RNA genes                                   | Ribosomal RNA genes             | <i>rrn4.5<sup>a</sup></i>      | <i>rrn5<sup>a</sup></i>        | <i>rrn16<sup>a</sup></i>    | <i>rrn23<sup>a</sup></i>    |                             |
|                                             | Transfer RNA genes              | <i>trnA-UGC<sup>a, b</sup></i> | <i>trnC-GCA</i>                | <i>trnD-GUC</i>             | <i>trnE-UUC</i>             | <i>trnF-GAA</i>             |
|                                             |                                 | <i>trnM-CAU</i>                | <i>trnG-GCC<sup>b</sup></i>    | <i>trnG-UCC</i>             | <i>trnH-GUG<sup>a</sup></i> | <i>trnI-CAU<sup>a</sup></i> |
|                                             |                                 | <i>trnI-GAU<sup>a, b</sup></i> | <i>trnK-UUU</i>                | <i>trnL-CAA<sup>a</sup></i> | <i>trnL-UAA<sup>b</sup></i> | <i>trnL-UAG</i>             |
|                                             |                                 | <i>trnM-CAU</i>                | <i>trnN-GUU<sup>a</sup></i>    | <i>trnP-UGG</i>             | <i>trnQ-UUG</i>             | <i>trnR-ACG<sup>a</sup></i> |
|                                             |                                 | <i>trnR-UCU</i>                | <i>trnS-GCU</i>                | <i>trnS-GGA</i>             | <i>trnS-UGA</i>             | <i>trnT-GGU</i>             |
|                                             |                                 | <i>trnT-UGU</i>                | <i>trnV-GAC<sup>a</sup></i>    | <i>trnV-UAC<sup>b</sup></i> | <i>trnW-CCA</i>             | <i>trnY-GUA</i>             |
| Photosynthetic genes                        | Subunits of photosystem I       | <i>psaA</i>                    | <i>psaB</i>                    | <i>psaC</i>                 | <i>psaI</i>                 | <i>psaJ</i>                 |
|                                             |                                 | <i>ycf3<sup>c</sup></i>        | <i>ycf4</i>                    |                             |                             |                             |
|                                             | Subunits of photosystem II      | <i>psbA</i>                    | <i>psbB</i>                    | <i>psbC</i>                 | <i>psbD</i>                 | <i>psbE</i>                 |
|                                             |                                 | <i>psbF</i>                    | <i>psbH</i>                    | <i>psbI</i>                 | <i>psbJ</i>                 | <i>psbK</i>                 |
|                                             |                                 | <i>psbL</i>                    | <i>psbM</i>                    | <i>psbN</i>                 | <i>psbT</i>                 | <i>psbZ</i>                 |
|                                             | Subunits of cytochrome          | <i>petA</i>                    | <i>petB<sup>b</sup></i>        | <i>petD<sup>b</sup></i>     | <i>petG</i>                 | <i>petL</i>                 |
|                                             |                                 | <i>petN</i>                    |                                |                             |                             |                             |
|                                             | Subunits of ATP synthase        | <i>atpA</i>                    | <i>atpB</i>                    | <i>atpE</i>                 | <i>atpF<sup>b</sup></i>     | <i>atpH</i>                 |
|                                             |                                 | <i>atpI</i>                    |                                |                             |                             |                             |
|                                             | The large subunit of Rubisco    | <i>rbcL</i>                    |                                |                             |                             |                             |
|                                             | Subunits of NADH dehydrogenase  | <i>ndhA<sup>b</sup></i>        | <i>ndhB<sup>a, b</sup></i>     | <i>ndhC</i>                 | <i>ndhD</i>                 | <i>ndhE</i>                 |
|                                             |                                 | <i>ndhF</i>                    | <i>ndhG</i>                    | <i>ndhH</i>                 | <i>ndhI</i>                 | <i>ndhJ</i>                 |
|                                             |                                 | <i>ndhK</i>                    |                                |                             |                             |                             |
| ATP-dependent protease subunit P            | <i>clpP<sup>c</sup></i>         |                                |                                |                             |                             |                             |
| Chloroplast envelope membrane protein       | <i>cemA</i>                     |                                |                                |                             |                             |                             |
| Transcription and translation-related genes | Small subunit of the ribosome   | <i>rps2</i>                    | <i>rps3</i>                    | <i>rps4</i>                 | <i>rps7<sup>a</sup></i>     | <i>rps8</i>                 |
|                                             |                                 | <i>rps11</i>                   | <i>rps12<sup>a, c, d</sup></i> | <i>rps14</i>                | <i>rps15</i>                | <i>rps16<sup>e</sup></i>    |
|                                             |                                 | <i>rps18</i>                   | <i>rps19</i>                   |                             |                             |                             |
|                                             | Large subunit of ribosome       | <i>rpl2<sup>a</sup></i>        | <i>rpl14</i>                   | <i>rpl16<sup>b</sup></i>    | <i>rpl20</i>                | <i>rpl22</i>                |
|                                             |                                 | <i>rpl23</i>                   | <i>rpl32</i>                   | <i>rpl33</i>                | <i>rpl36</i>                |                             |
|                                             | DNA-dependent RNA polymerase    | <i>rpoA</i>                    | <i>rpoB</i>                    | <i>rpoC1<sup>b</sup></i>    | <i>rpoC2</i>                |                             |
|                                             | Translational initiation factor | <i>infA<sup>e</sup></i>        |                                |                             |                             |                             |

|                           |                                  |                           |  |  |  |  |
|---------------------------|----------------------------------|---------------------------|--|--|--|--|
| Other genes               | Maturase                         | <i>matK</i>               |  |  |  |  |
|                           | Subunit of acetyl-CoA            | <i>accD</i>               |  |  |  |  |
|                           | C-type cytochrome synthesis gene | <i>ccsA</i>               |  |  |  |  |
|                           | Component of TIC complex         | <i>ycf1<sup>a,f</sup></i> |  |  |  |  |
| Genes of unknown function | Hypothetical proteins            | <i>ycf2<sup>a</sup></i> , |  |  |  |  |

2

3 <sup>a</sup> - Two gene copies in IRs; <sup>b</sup> - Gene containing a single intron; <sup>c</sup> - Gene containing two introns; <sup>d</sup> - Gene divided into two independent  
4 transcription units; <sup>e</sup> - Pseudogene; <sup>f</sup> - Two copies - One intact gene and another is a pseudogene.

**Supplementary Table S3. List of deleted genes in Asparagales**

| Sl. No. | Gene Name                                            | Species Name                        | Sub-Family Name  | GenBank Accession number |
|---------|------------------------------------------------------|-------------------------------------|------------------|--------------------------|
| 1.      | <i>rpl32</i>                                         | <i>Aloe vera</i>                    | Asphodeloideae   | NC_035506                |
| 2.      | <i>rpl23</i>                                         | <i>Eustrephus latifolius</i>        | Lomandroideae    | NC_025305                |
| 3.      | <i>rps19</i> - IRa                                   | <i>Polygonatum cyrtoneuma</i>       | Nolinoideae      | NC_028429                |
| 4.      | <i>rps19</i> - Both                                  | <i>Hesperaloe parviflora</i>        | Agavoideae       | NC_032703                |
| 5.      | <i>rps19</i> - Both                                  | <i>Schoenolirion croceum</i>        | Agavoideae       | NC_032710                |
| 6.      | <i>rps19</i> - Both                                  | <i>Hosta ventricosa</i>             | Agavoideae       | NC_032706                |
| 7.      | <i>rps19</i> - Both                                  | <i>Hesperocallis undulata</i>       | Agavoideae       | NC_032704                |
| 8.      | <i>rps19</i> - Both                                  | <i>Hesperoyucca whipplei</i>        | Agavoideae       | NC_032705                |
| 9.      | <i>rps19</i> - Both                                  | <i>Chlorogalum pomeridianum</i>     | Agavoideae       | NC_032701                |
| 10.     | <i>rps19</i> - Both                                  | <i>Camassia scilloides</i>          | Agavoideae       | NC_032700                |
| 11.     | <i>rps19</i> - Both                                  | <i>Anthericum ramosum</i>           | Agavoideae       | NC_035972                |
| 12.     | <i>rps16</i>                                         | <i>Eustrephus latifolius</i>        | Lomandroideae    | NC_025305                |
| 13.     | <i>rps16</i>                                         | <i>Cordyline indivisa</i>           | Lomandroideae    | NC_035998                |
| 14.     | <i>rps16</i>                                         | <i>Allium sativum</i>               | Allioideae       | NC_031829                |
| 15.     | <i>rps16</i>                                         | <i>Hosta ventricosa</i>             | Agavoideae       | NC_032706                |
| 16.     | <i>rps16</i>                                         | <i>Beschorneria septentrionalis</i> | Agavoideae       | NC_032699                |
| 17.     | <i>rps2</i>                                          | <i>Allium sativum</i>               | Allioideae       | NC_031829                |
| 18.     | <i>rbcL</i> , <i>atpB</i> ,<br><i>atpE</i> inversion | <i>Cordyline indivisa</i>           | Lomandroideae    | NC_035998                |
| 19.     | <i>accD</i>                                          | <i>Eustrephus latifolius</i>        | Lomandroideae    | NC_025305                |
| 20.     | <i>clpP</i>                                          | <i>Eustrephus latifolius</i>        | Lomandroideae    | NC_025305                |
| 21.     | <i>clpP</i>                                          | <i>Cordyline indivisa</i>           | Lomandroideae    | NC_035998                |
| 22.     | <i>infA</i>                                          | <i>Eustrephus latifolius</i>        | Lomandroideae    | NC_025305                |
| 23.     | <i>infA</i>                                          | <i>Allium sativum</i>               | Allioideae       | NC_031829                |
| 24.     | <i>infA</i>                                          | <i>Anthericum ramosum</i>           | Agavoideae       | NC_035972                |
| 25.     | <i>infA</i>                                          | <i>Aphyllanthes monspeliensis</i>   | Aphyllanthoideae | NC_035968                |
| 26.     | <i>infA</i>                                          | <i>Aloe vera</i>                    | Asphodeloideae   | NC_035506                |
| 27.     | <i>infA</i>                                          | <i>Milla biflora</i>                | Brodiaeoideae    | NC_036000                |
| 28.     | <i>infA</i>                                          | <i>Camassia scilloides</i>          | Agavoideae       | NC_032700                |
| 29.     | <i>infA</i>                                          | <i>Yucca brevifolia</i>             | Agavoideae       | NC_032711                |
| 30.     | <i>infA</i>                                          | <i>Hesperocallis undulata</i>       | Agavoideae       | NC_032704                |
| 31.     | <i>infA</i>                                          | <i>Hosta ventricosa</i>             | Agavoideae       | NC_032706                |
| 32.     | <i>infA</i>                                          | <i>Nolina atopocarpa</i>            | Nolinoideae      | NC_032708                |
| 33.     | <i>infA</i>                                          | <i>Convallaria majalis</i>          | Nolinoideae      | In this study            |
| 34.     | <i>infA</i>                                          | <i>Liriope spatia</i>               | Nolinoideae      | In this study            |
| 35.     | <i>ycf1</i>                                          | <i>Polygonatum cyrtoneuma</i>       | Nolinoideae      | NC_028429                |

**Supplementary Table S3.** The list of pseudogenes, intron deletion gene, and gene inversion in the Asparagales order of plants.

| Sub-Family Name  | Species Name                            | <i>accD</i> | <i>clpP</i> <sup>#</sup> | <i>infA</i> | <i>rbcL-atpE</i> * | <i>rpl23</i> | <i>rpl32</i> | <i>rps2</i> | <i>rps16</i> | <i>rps19</i> <sup>@</sup> | <i>ycf1</i> <sup>\$</sup> |
|------------------|-----------------------------------------|-------------|--------------------------|-------------|--------------------|--------------|--------------|-------------|--------------|---------------------------|---------------------------|
| Agavoideae       | <i>Anthericum ramosum</i>               |             |                          | ■           |                    |              |              |             |              | ■                         |                           |
|                  | <i>Beschorneria septentrionalis</i>     |             |                          |             |                    |              |              |             | ■            |                           |                           |
|                  | <i>Camassia scilloides</i>              |             |                          | ■           |                    |              |              |             |              | ■                         |                           |
|                  | <i>Chlorogalum pomeridianum</i>         |             |                          |             |                    |              |              |             |              | ■                         |                           |
|                  | <i>Hesperaloe parviflora</i>            |             |                          |             |                    |              |              |             |              | ■                         |                           |
|                  | <i>Hesperocallis undulata</i>           |             |                          | ■           |                    |              |              |             |              | ■                         |                           |
|                  | <i>Hesperoyucca whipplei</i>            |             |                          |             |                    |              |              |             |              | ■                         |                           |
|                  | <i>Hosta ventricosa</i>                 |             |                          | ■           |                    |              |              |             | ■            | ■                         |                           |
|                  | <i>Schoenolirion croceum</i>            |             |                          |             |                    |              |              |             |              | ■                         |                           |
|                  | <i>Yucca brevifolia</i>                 |             |                          | ■           |                    |              |              |             |              |                           |                           |
| Allioideae       | <i>Allium sativum</i>                   |             |                          | ■           |                    |              |              | ■           | ■            |                           |                           |
| Aphyllanthoideae | <i>Aphyllanthes monspeliensis</i>       |             |                          | ■           |                    |              |              |             |              |                           |                           |
| Asparagoideae    | <i>Asparagus officinalis</i>            |             |                          |             |                    |              |              |             |              |                           |                           |
| Asphodeloideae   | <i>Aloe vera</i>                        |             |                          | ■           |                    |              | ■            |             |              |                           |                           |
| Brodiaeoideae    | <i>Milla biflora</i>                    |             |                          | ■           |                    |              |              |             |              |                           |                           |
| Lomandroideae    | <i>Cordyline indivisa</i>               |             | ■                        |             | ■                  |              |              |             | ■            |                           |                           |
|                  | <i>Eustrephus latifolius</i>            | ■           | ■                        | ■           |                    | ■            |              |             | ■            |                           |                           |
| Nolinoideae      | <i>Convallaria keiskei</i> <sup>1</sup> |             |                          | ■           |                    |              |              |             |              |                           |                           |
|                  | <i>Liriope spatia</i> <sup>2</sup>      |             |                          | ■           |                    |              |              |             |              |                           |                           |
|                  | <i>Mianthemum bicolor</i>               |             |                          |             |                    |              |              |             |              |                           |                           |
|                  | <i>Nolina atopocarpa</i>                |             |                          | ■           |                    |              |              |             |              |                           |                           |
|                  | <i>Polygonatum cyrtonema</i>            |             |                          | ■           |                    |              |              |             |              | ■                         | ■                         |

<sup>#</sup> Two introns of *clpP* gene were lost in the cp genome.

\* The protein-coding genes *rbcL*, *atpB* and *atpE* inverted in the LSC region.

<sup>@</sup> *rps19* – Two copies of *rps19* genes were deleted in IR regions of above mentioned species except for *Polygonatum crytonema*.

<sup>\$</sup> *ycf1* – Two copies of *ycf1* were pseudogenes in *Polygonatum crytonema*.

<sup>1, 2</sup> These plants were used in the present study.

Supplementary Table S4. List of primers used in this study

| Primer name | Primer sequence position (bp) | Primer location region   | Primer sequence (5' - 3' direction) | Product size (bp) |
|-------------|-------------------------------|--------------------------|-------------------------------------|-------------------|
| 1F          | 94,245 – 94,269               | <i>ycf2</i>              | GGAACCATGCAGTACCAGACACGAG           | 4,910             |
| 1R          | 99,131 – 99,154               | <i>ndhB</i>              | ACCAAGAAATAACCCCTCACGTGCG           |                   |
| 2F          | 87,259 – 87,283               | <i>rpl2</i>              | TGCCTTGCGGTAATGATTCCTCTGG           | 8,943             |
| 2R          | 96,178 – 96,201               | Mitochondrial DNA region | AGAACCCCATTTTCGACCAAGTTCCG          |                   |
| 3F          | 96,238 – 96,262               | Mitochondrial DNA region | GTTACTGGTCGAGCCACTGGAATGG           | 8,867             |
| 3R          | 105,080 – 105,104             | <i>rrn16</i>             | AAGGGCAGGTTCTTACGCGTACTC            |                   |
| 4F          | 87,259 – 87,283               | <i>rpl2</i>              | TGCCTTGCGGTAATGATTCCTCTGG           | 17,846            |
| 4R          | 105,080 – 105,104             | <i>rrn16</i>             | AAGGGCAGGTTCTTACGCGTACTC            |                   |
